# Supplementary material
Source: PubMed Central journal article supplement (PMC2766918)
Supplement: NIHMS57221-supplement-01.pdf [file NIHMS57221-supplement-01.pdf]

# Axoneme $\beta$ -Tubulin Sequence Determines Attachment of Outer Dynein Arms

Elizabeth C. Raff, Henry D. Hoyle, Ellen M. Popodi,  
and F. Rudolf Turner

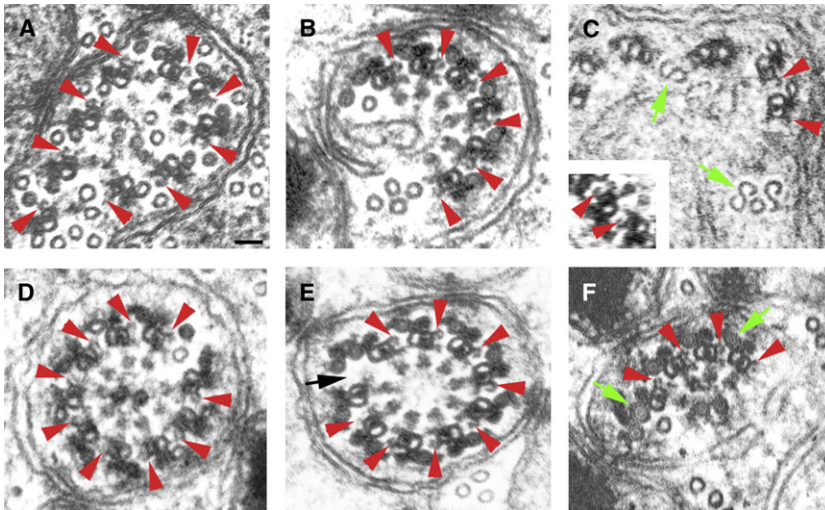

Figure S1. Axonemes Utilizing Variant  $\beta$ -Tubulins Have Outer Dynein Arms If Amino Acid 57 Is Glycine, Even If Other Aspects of Axoneme Architecture Are Defective

(A–C) Axonemes in males expressing mutant alleles of *Drosophila*  $\beta$ 2-tubulin.

(A) Abnormal axoneme in a sterile male that is heterozygous for  $B2t^D$ , a dominant  $\beta$ 2 mutation that causes profound disruption of axoneme assembly [S1, S2]. Although axoneme architecture is disorganized, outer dynein arms (ODAs) are present on all doublets (indicated by red arrowheads). The  $B2t^D$  mutation is a lysine substitution for glutamic acid 194 [S3].

(B) Partial axoneme in a sterile homozygous  $B2t^7$  male; ODAs are present on all doublets (indicated by red arrowheads).  $B2t^7$  axonemes are nonfunctional and often lack the central pair [S4]. The  $B2t^7$  mutation is an asparagine substitution for aspartic acid 114 [S3].

(C) Abortive axonemal doublets in a homozygous  $B2t^8$  male. The  $B2t^8$  protein disrupts all categories of microtubules in which  $\beta$ 2 normally functions [S3, S4]. The most notable defect is formation of unclosed

or S-shaped microtubules (examples indicated by green arrows). In rare morphologically normal doublets, ODAs are present, as shown here (indicated by red arrowheads). The inset shows doublets in another  $B2t^8$  male; ODAs are present (indicated by red arrowheads). The  $B2t^8$  mutation is a lysine substitution for glutamic acid 288 [S5].

(D–F) Axonemes in males expressing chimeric or heterologous  $\beta$ -tubulins.

(D) Axoneme in a sterile male expressing two transgenic copies of the chimeric protein  $\beta$ 2 $\beta$ 1C16 with no wild-type  $\beta$ 2 present. In  $\beta$ 2 $\beta$ 1C16, the 16 amino acids of the  $\beta$ 1 variable C-terminal tail replace the 15 amino acids of the  $\beta$ 2 C-terminal tail (see CTT sequences in Table S2) [S6].  $\beta$ 2 $\beta$ 1C16 can support axoneme assembly, but intact axonemes are rare; the great majority of axonemes in  $\beta$ 2 $\beta$ 1C16 males are fragmented or disorganized [S6]. In the example here, all nine doublets are present, but the axonemal ring is opened; ODAs are present on all doublets (indicated by red arrowheads).

(E) Defective 9 + 0 axoneme in a sterile male expressing one transgenic copy of *Drosophila*  $\beta$ 1-tubulin in late stages of spermatogenesis in which  $\beta$ 1 is not normally expressed, with no wild-type  $\beta$ 2 present.  $\beta$ 1 can support assembly of all aspects of axonemes except for the central pair; other associated structures, including dynein arms, spokes, and linkers, are present [S7, S8].  $\beta$ 1 axonemes fail to maintain longitudinal stability and are very short (only approximately 1% of the normal 2 mm length of the wild-type *Drosophila* sperm tail). The ring of the  $\beta$ 1 axoneme here is slightly disrupted; all doublets have ODAs (indicated by red arrowheads), except for the doublet at the opening in the ring, which lacks an ODA (indicated by black arrow).

(F) Partial axoneme in a sterile male in which the  $\beta$ 2 homolog from the moth *Heliothis virescens* (*H.v.*) is coexpressed with  $\beta$ 2. *H.v.*  $\beta$ 2 can not alone support axoneme assembly at all and exerts strong dominant disruption when it is coexpressed with  $\beta$ 2 [S9]. The axoneme shown is from a male in which the moth  $\beta$ 2 constitutes approximately 60% of the total  $\beta$ -tubulin. The most striking phenotype resulting from expression of the moth  $\beta$ 2 homolog in the *Drosophila* testis is the conversion of some of the accessory microtubules from the normal 13 protofilament architecture of the fly to the moth's 16 protofilament architecture (indicated by green arrows). However, even in fragmented or partial axonemes, the doublets have ODAs, as shown here (indicated by red arrowheads). All of the  $\beta$ -tubulins utilized in the axonemes shown in (A)–(F) have glycine 56 in the internal variable region (see sequences in Table 1). The scale bar represents 50 nm.

Table S1. Addition of Outer and Inner Dynein Arms and Ectopic Luminal Filaments in Doublet Microtubules of Axonemes in Wild-Type Males and Males Expressing  $\beta$ -Tubulins with Variant Internal Variable Regions

| $\beta$ -Tubulins Utilized in Axonemes                                                                                                                                                 | Number of Males | Dynein Arms           |                     |                     | Luminal Filaments in Doublet MTs |                                 |                                 |
|----------------------------------------------------------------------------------------------------------------------------------------------------------------------------------------|-----------------|-----------------------|---------------------|---------------------|----------------------------------|---------------------------------|---------------------------------|
|                                                                                                                                                                                        |                 | Total Axonemes Scored | Average ODA/Axoneme | Average IDA/Axoneme | Total Axonemes Scored            | Average A Tubes with LF/Axoneme | Average B Tubes with LF/Axoneme |
| <b>Males Expressing Only Wild-Type <math>\beta</math>2</b>                                                                                                                             |                 |                       |                     |                     |                                  |                                 |                                 |
| Wild-type males (two copies $\beta$ 2; males have only wild-type $\beta$ 2; normal $\beta$ -tubulin pool size)                                                                         | 4               | 64                    | 9                   | 9                   | 35                               | 0                               | 0                               |
| Hemizygous $\beta$ 2 (one copy $\beta$ 2; males have only wild-type $\beta$ 2, but half the normal $\beta$ -tubulin pool size)                                                         | 10              | 74                    | 8.96                | 8.96                | 69                               | 0                               | 0                               |
| <b>Males Expressing <math>B2t^6</math></b>                                                                                                                                             |                 |                       |                     |                     |                                  |                                 |                                 |
| Homozygous $B2t^6$ (two copies $B2t^6$ ; males have only mutant $\beta$ 2 <sub>6</sub> ; normal $\beta$ -tubulin-pool size)                                                            | 13              | 100                   | 3.2                 | 8.7                 | 86                               | 7.1                             | 0.8                             |
| Hemizygous $B2t^6$ (one copy $B2t^6$ ; males have only mutant $\beta$ 2 <sub>6</sub> ; half the normal $\beta$ -tubulin-pool size)                                                     | 4               | 23                    | 3.1                 | 8.8                 | 9                                | 6.2                             | 2.9                             |
| Heterozygous $B2t^6$ (one copy $B2t^6$ + one copy $\beta$ 2; 50% mutant $\beta$ 2 <sub>6</sub> ; normal $\beta$ -tubulin-pool size)                                                    | 14              | 111                   | 8.4                 | 8.8                 | 95                               | 0.4                             | 0                               |
| <b>Males Coexpressing <math>\beta</math>3<math>\beta</math>2C &amp; <math>\beta</math>2 (% <math>\beta</math>3<math>\beta</math>2C in total <math>\beta</math>-tubulin pool)</b>       |                 |                       |                     |                     |                                  |                                 |                                 |
| $\beta$ 3 $\beta$ 2C + $\beta$ 2 (50% $\beta$ 3 $\beta$ 2C)                                                                                                                            | 4               | 50                    | 1.7                 | 8.8                 | 50                               | 7.0                             | 0.1                             |
| $\beta$ 3 $\beta$ 2C + $\beta$ 2 (33% $\beta$ 3 $\beta$ 2C)                                                                                                                            | 6               | 105                   | 7.3                 | 8.96                | 100                              | 1.8                             | 0                               |
| $\beta$ 3 $\beta$ 2C + $\beta$ 2 (25% $\beta$ 3 $\beta$ 2C)                                                                                                                            | 4               | 46                    | 7.7                 | 8.96                | 45                               | 1.4                             | 0                               |
| $\beta$ 3* + $\beta$ 2 (50% $\beta$ 3*)                                                                                                                                                | 4               | 33                    | 3.8                 | 8.9                 | 33                               | 4.4                             | 0.03                            |
| <b>Males Coexpressing <math>\beta</math>3 or <math>\beta</math>3* and <math>\beta</math>2 (% <math>\beta</math>3 or <math>\beta</math>3* in total <math>\beta</math>-tubulin pool)</b> |                 |                       |                     |                     |                                  |                                 |                                 |
| $\beta$ 3* + $\beta$ 2 (33% $\beta$ 3*)                                                                                                                                                | 4               | 45                    | 5.4                 | 8.98                | 45                               | 1.8                             | 0.02                            |
| $\beta$ 3 + $\beta$ 2 (31% $\beta$ 3)                                                                                                                                                  | 9               | 58                    | 2.3                 | 8.95                | 58                               | 5.0                             | 0.78                            |
| $\beta$ 3* + $\beta$ 2 (25% $\beta$ 3*)                                                                                                                                                | 1               | 11                    | 7.6                 | 9                   | 11                               | 0.5                             | 0                               |
| $\beta$ 3 + $\beta$ 2 (25% $\beta$ 3)                                                                                                                                                  | 1               | 6                     | 3.5                 | 8.7                 | 6                                | 4.3                             | 0.17                            |
| $\beta$ 3 + $\beta$ 2 (18% $\beta$ 3)                                                                                                                                                  | 2               | 18                    | 6.2                 | 8.94                | 18                               | 2.5                             | 0                               |

Complete data sets are shown for the studies presented in Figures 1 and 2 and Tables 2 and 3, documenting the dependence of addition of outer dynein arms (ODAs) on sequence in the axoneme  $\beta$ -tubulin internal variable region (IVR). Axoneme morphology and number of ODAs and inner dynein arms (IDAs) per axoneme were scored as described in Experimental Procedures. In *Drosophila* spermatogenesis, luminal filaments (LFs) are added to central-pair and accessory microtubules in late intermediate stages, well after dynein arms are added. To avoid false negatives, we scored LFs in doublet microtubules only in axonemes in which LFs were present in the accessory and central-pair microtubules.

In *Drosophila* males,  $\beta$ 2 is the only  $\beta$ -tubulin utilized in sperm axonemes [S1, S2]. The transgenic constructs for male germline expression of other  $\beta$ -tubulins  $\beta$ 3,  $\beta$ 3\*, and  $\beta$ 3 $\beta$ 2C, shown in Table 2 and Table S1, were as follows: (1)  $p\{\beta$ 3\} contains the 5' UTR of  $\beta$ 2 joined to the coding sequence of *Drosophila*  $\beta$ 3-tubulin, plus 3' UTR from  $\beta$ 3. This construct drives  $\beta$ 3 in the male germline with the same temporal and spatial specificity as  $\beta$ 2, but at lower levels than wild-type  $\beta$ 2 [S10, S11].  $\beta$ 3 is not normally expressed in the male germline [S12, S13]. (2)  $p\{\beta$ 3\*\} contains the 5' UTR and first 19 codons of  $\beta$ 2 joined to the remainder of the  $\beta$ 3 coding sequence, inserted into 3' UTR sequences from  $\beta$ 2 [S11]. (3)  $p\{\beta$ 3 $\beta$ 2C\} encodes a chimeric  $\beta$ -tubulin in which the final 104 amino acids of  $\beta$ 2 replace the equivalent C-terminal residues in  $\beta$ 3\*, with 3' UTR sequences from  $\beta$ 2 [S11].  $\beta$ 2's 5' UTR specifies pattern of expression; the  $\beta$ 2 3' UTR is necessary to obtain the correct level of expression [S11].  $p\{\beta$ 3\*\} and  $p\{\beta$ 3 $\beta$ 2C\} drive the respective proteins in the male germline with the same temporal and spatial specificity and at the same level as  $\beta$ 2.  $\beta$ 3 and  $\beta$ 3\* differ in sequence in two conservative amino acids in the first exon; at equivalent levels of expression, the two proteins exhibit the same phenotypes in spermatogenesis [S10, S11].

Expression levels of variant tubulins in the male germline were determined by gel electrophoresis as previously described.  $B2t^6$  is an EMS-induced mutation in the endogenous  $\beta$ 2 gene; the mutant  $B2t^6$  protein is expressed in the same pattern and level as wild-type  $\beta$ 2 [S3, S4, S14, S15].  $\beta$ 3\* and  $\beta$ 3 $\beta$ 2C are also expressed at the same levels as wild-type  $\beta$ 2; thus, expression level directly reflects gene copy number [S11]. Gene copy numbers in males expressing different relative amounts of wild-type  $\beta$ 2 and one of the transgenic proteins are as follows: Transgenic protein is 50% of the total  $\beta$ -tubulin pool in males with one copy each of the  $\beta$ 2 gene and the transgene. Transgenic protein is 33% of the total  $\beta$ -tubulin pool in males with two copies of  $\beta$ 2 and one copy of the transgene. Transgenic protein is 25% of the total  $\beta$ -tubulin pool in males with three copies of  $\beta$ 2 and one copy of the transgene. Transgenic  $\beta$ 3 is expressed at approximately 22% the normal  $\beta$ 2 level [S10, S11]. Transgenic  $\beta$ 3 is 31% of the total  $\beta$ -tubulin pool in males with one copy of the  $\beta$ 2 gene and two copies of the  $p\{\beta$ 3\} transgene or an equivalent gene ratio. Transgenic  $\beta$ 3 is 25% of the total  $\beta$ -tubulin pool in males with two copies of the  $\beta$ 2 gene and three copies of the  $p\{\beta$ 3\} transgene. Transgenic  $\beta$ 3 is 18% of the total  $\beta$ -tubulin pool in males with one copy of the  $\beta$ 2 gene and one copy of the  $p\{\beta$ 3\} transgene or an equivalent gene ratio.

Male fertility depends on both the number of ODAs and the C-terminal tail, as illustrated by males expressing  $\beta$ 3,  $\beta$ 3\*, or  $\beta$ 3 $\beta$ 2C. As shown in the table, deficits in the number of ODAs per axoneme and presence of ectopic LFs in doublets are approximately the same in males expressing  $\beta$ 3,  $\beta$ 3\*, or  $\beta$ 3 $\beta$ 2C at equivalent proportions in the male germline  $\beta$ -tubulin pool. However, the ability to generate functional axonemes depends on the presence of  $\beta$ 2 C-terminal sequences [S11]. When  $\beta$ 3 or  $\beta$ 3\* constitute 25% or more of the  $\beta$ -tubulin pool, males are completely sterile. However,  $\beta$ 3 $\beta$ 2C exerts a less severe dominant phenotype: Males are sterile when  $\beta$ 3 $\beta$ 2C constitutes 50% of the  $\beta$ -tubulin pool, weakly fertile when  $\beta$ 3 $\beta$ 2C constitutes 33% of the  $\beta$ -tubulin pool, and fertile when  $\beta$ 3 $\beta$ 2C constitutes 25% of the  $\beta$ -tubulin pool.

Table S2. Internal Variable Region and C-Terminal Sequences for Axonemal and Nonaxonemal  $\beta$ -Tubulins Compiled in Table 4

|                                                                                               | IVR <sup>a</sup>    | C Terminus <sup>b</sup>                                | References and/or<br>NCBI Protein<br>Database Accessions |
|-----------------------------------------------------------------------------------------------|---------------------|--------------------------------------------------------|----------------------------------------------------------|
| <b>I. Axonemal <math>\beta</math>-Tubulins<sup>c</sup></b>                                    |                     |                                                        |                                                          |
| <b>Animals</b>                                                                                |                     |                                                        |                                                          |
| <i>D. melanogaster</i> , $\beta 2$ (85D) (identical in all <i>Drosophila</i> species)         | YNEA <u>TGA</u> KYV | EATAD <u>EEGEFDEDEEGGGDE</u> <sub>446</sub>            | [S5], A27810; [S16], NP_524290 [S17]                     |
| Moth, <i>Heliothis virescens</i> , testis $\beta$ ( $\beta 2$ homolog)                        | YNEA <u>SGG</u> KYV | DATAD <u>DEGEFDEEAE</u> EGGLE                          | [S9], AAC47425                                           |
| Moth, <i>Bombyx mori</i> , $\beta 2$ homolog                                                  | YNEA <u>SGG</u> KYV | DATAD <u>DEGEFDEEAE</u> EGGLE                          | [S18], AB072310                                          |
| Mosquito, <i>Anopheles gambiae</i> , $\beta 2$ homolog                                        | YNEA <u>SGG</u> KYV | EATAD <u>DEGEMDEEE</u> EGGED                           | [S19], EAA10161                                          |
| Honey bee, <i>Apis mellifera</i> , $\beta 2$ homolog                                          | YNEA <u>SGG</u> KYV | EATAE <u>EEGEFDEEE</u> EGEGEHP                         | [S20], XP_394038                                         |
| Beetle, <i>Tribolium castaneum</i> , $\beta 2$ homolog                                        | YNEA <u>TGG</u> KYV | DATAE <u>EEGEFDEEE</u> EGDNEGEN                        | [S21], XP_969993                                         |
| Vertebrate class IVb <sup>d</sup> , major testis isotype; expressed in many tissues           | YNEA <u>AGG</u> KYV | DATAE <u>EEGEFEEEE</u> AAAAE                           | Chicken [S22]                                            |
|                                                                                               | YNEA <u>TGG</u> KYV | DATAE <u>EEGEFEEEE</u> AAAAEVA                         | Human, AAN87335; Mouse, D25437                           |
| Zebra fish, <i>Danio rubrio</i> , similar to class IV (two sequences with the same IVR)       | YNEA <u>TGG</u> KYV | DATAE <u>EEGEFEEEE</u> GEKELA                          | [S23], NP_942104                                         |
|                                                                                               | YNEA <u>TGG</u> KYV | DATAE <u>EEGEFEEEE</u> AEDDA                           | NP_942113                                                |
| Antarctic yellowbelly rockcod, <i>Notothenia coriiceps</i> , Nc $\beta 1$ -3                  | YNEA <u>SGG</u> KYV | DATAE <u>EEGEFEEEE</u> GEDLA (Nc $\beta 1$ )           | [S24]                                                    |
|                                                                                               | YNEA <u>SGG</u> KYV | DATAE <u>EEGEFDEE</u> GEDLA (Nc $\beta 2$ )            |                                                          |
|                                                                                               | YNEA <u>SGG</u> KYV | DATAE <u>EEGEFEEEE</u> GYEDGA (Nc $\beta 3$ )          |                                                          |
| Sea urchin, <i>Strongylocentrotus purpuratus</i>                                              | FNEA <u>TGG</u> KYV | DATAE <u>EEGEFEEEE</u> EEEDLEQ                         | [S25], XP_001192274                                      |
| Sea urchin, <i>Paracentrotus lividus</i>                                                      | YNEA <u>TGG</u> KYV | DATAE <u>EEGEFDEEE</u> EGDEEAA                         | [S26], P11833                                            |
| Ascidian, <i>Halocynthia roretzi</i>                                                          | YNEA <u>TGG</u> KYV | DATAE <u>EEGEFDEEE</u> EGDEEEV                         | [S27], BAA22382                                          |
| <b>Plants<sup>e</sup></b>                                                                     |                     |                                                        |                                                          |
| Moss (Bryophyte), <i>Physcomitrella patens</i> , Beta 1-6 (six sequences with the same IVR)   | YNEA <u>SGG</u> RYV | DASAE <u>EEGEYEED</u> LEEA (B1,2,6)                    | [S28], AAQ88113-AAQ88118                                 |
|                                                                                               | YNEA <u>SGG</u> RYV | DASAE <u>EEGEYEDD</u> PEEA (B3)                        |                                                          |
|                                                                                               | YNEA <u>SGG</u> RYV | DASAE <u>EEGEYEDD</u> LEEA (B5)                        |                                                          |
|                                                                                               | FDEA <u>SGG</u> RYV | DASAE <u>EEGEYEED</u> LEEA (B4)                        |                                                          |
| Spikemoss (Lycophyte), <i>Selaginella moellendorffii</i> , (five sequences with the same IVR) | FNEA <u>SGG</u> RYV | DASAD <u>DEGEFEEEE</u>                                 | [S29]                                                    |
|                                                                                               | FNEA <u>SGG</u> RYV | DATAD <u>EEGEFEEEE</u>                                 |                                                          |
|                                                                                               | FNEA <u>SGG</u> RYV | DASAD <u>EEGEFEEEE</u> EGEG                            |                                                          |
|                                                                                               | FNEA <u>SGG</u> RYV | DASAD <u>EEGEFEEEE</u> GGEA                            |                                                          |
|                                                                                               | FNEA <u>SGG</u> RYV | DASAD <u>EEGEFEEEE</u> GAEA                            |                                                          |
| <b>Fungi</b>                                                                                  |                     |                                                        |                                                          |
| <i>Blastocladiella emersonii</i>                                                              | YNEA <u>TGG</u> KYV | DATAD <u>DEGELDEE</u> EGEGEAA                          | [S30], ABK34895                                          |
| <b>Protists</b>                                                                               |                     |                                                        |                                                          |
| <i>Chlamydomonas reinhardtii</i>                                                              | FNEA <u>TGG</u> RYV | DASAE <u>EEGEFEGEEEE</u> AA                            | [S31], EDP02933                                          |
| <i>Tetrahymena pyriformis</i>                                                                 | YNEA <u>TGG</u> RYV | DATAE <u>EEGEFEEEE</u> FGEN                            | [S32], CAA31258                                          |
| <i>Paramecium tetraurelia</i>                                                                 | YNEA <u>TGG</u> RYV | DATAE <u>EEGEFEEEE</u> GEQ                             | [S33, S34], AA47663                                      |
| <i>Euglena gracilis</i>                                                                       | YNEA <u>TGG</u> RYV | DATVE <u>EEGEFDEE</u> FDVEQY                           | [S35], AAK37837                                          |
| <i>Polytomella agilis</i>                                                                     | FNEA <u>TGS</u> RYV | DASAE <u>EEGEFGE</u> EEEEEN                            | [S36], P22852                                            |
| <i>Volvox, Carteri f. nagariensis</i>                                                         | FNEA <u>TGG</u> RYV | DASAE <u>EEGEFGE</u> EEEEEN                            | [S37], CAA31334                                          |
| Diatom, <i>Thalassiosira weissflogii</i>                                                      | FNEA <u>TGG</u> RYV | DATAD <u>EEGEFDEE</u> DEMEG                            | [S38], Q9LK18                                            |
| Brown alga, <i>Ectocarpus variabilis</i> , $\beta 5$                                          | FNEA <u>TGG</u> RYV | DATAE <u>EEGEFDEE</u> EELDDAMG                         | [S38, S39], P30156                                       |
| <i>Stylonychia lemnae</i>                                                                     | YNEA <u>TGG</u> RYV | DATAE <u>DEEEMDEE</u> EQME                             | [S40]                                                    |
| <i>Trypanosoma brucei</i>                                                                     | FDEA <u>TGG</u> RYV | DATIE <u>EEGEFDEE</u> EQY                              | [S41], CAJ16365                                          |
| <i>Plasmodium falciparum</i>                                                                  | YNEA <u>TGG</u> RYV | DATAE <u>EEGEFEEEE</u> FGDVEA                          | [S42], CAA34207                                          |
| <i>Toxoplasma gondii</i>                                                                      | YNEA <u>TGG</u> RFV | DATAE <u>EEGEFDEE</u> EEGEMGAEEGA                      | [S43], P10878                                            |
| <i>Leishmania</i> (sequences from 11 species with two different IVRs)                         | GDES <u>TGG</u> RYV | DATVE <u>EEGEYDEE</u> QEAY (one species)               | [S44]                                                    |
|                                                                                               | GDES <u>TGG</u> RYV | DATVE <u>EEGEYDEE</u> QEAY (two species)               |                                                          |
|                                                                                               | GDES <u>TGG</u> RYV | DATVE <u>EEGEFDEE</u> EEAY (one species)               |                                                          |
|                                                                                               | GDES <u>AGG</u> RYV | DATVE <u>EEGEYDEE</u> QEAY (three species)             |                                                          |
|                                                                                               | GDES <u>AGG</u> RYV | DATVE <u>EEGEYDEE</u> QEAY (one species)               |                                                          |
|                                                                                               | GDES <u>AGG</u> RYV | DATVE <u>EEGEYDEE</u> EEAY (two species)               |                                                          |
| <i>Physarum polycephalum</i> , $\beta 1$                                                      | YNEA <u>TGG</u> KYV | DATID <u>DEEGGEEEE</u> GGAEAAEQQRKH<br>YVIDYVPSVCVILIR | [S45]                                                    |
| <i>Naegleria gruberi</i>                                                                      | YNEA <u>TGG</u> RYV | DATAE <u>EEGEFDENE</u> GAEEGEQPADY                     | [S46], P34108                                            |

(Continued on next page)

Table S2. Continued

|                                                                                                                 | IVR <sup>a</sup>    | C Terminus <sup>b</sup>        | References and/or<br>NCBI Protein<br>Database Accessions |
|-----------------------------------------------------------------------------------------------------------------|---------------------|--------------------------------|----------------------------------------------------------|
| <i>Giardia lamblia</i>                                                                                          | FNEA <u>AGG</u> RYV | EAGVD <u>EGEEFEEEE</u> DFGDEYA | [S47], EDO79714                                          |
| Choanoflagellate, <i>Monosiga brevicollis</i>                                                                   | YNEA <u>TGG</u> KYV | DATAE <u>EEGEFDEEE</u> EEME    | [S48], EDQ92151                                          |
| II. Nonaxonemal $\beta$ -Tubulins <sup>f</sup>                                                                  |                     |                                |                                                          |
| Animals                                                                                                         |                     |                                |                                                          |
| <i>D. melanogaster</i> , $\beta$ 1                                                                              | YNEA <u>SGG</u> KYV | EATAD EDAEFEEEEQAEVDEN         | [S49], Q24560;                                           |
| <i>C. elegans</i> , Mec 7 (neural specific)                                                                     | YNEA <u>GSN</u> KYV | EAAD EDAAEAFDGE                | [S16], NP_523795                                         |
| Vertebrate class I <sup>d</sup> , constitutive;<br>many tissues                                                 | YNEA <u>TGG</u> KYV | DATAE EEEDFGEEAEAAA            | [S50], CAA33320                                          |
| Vertebrate class II <sup>d</sup> , major neuronal;<br>many tissues                                              | YNEA <u>TGN</u> KYV | DATAD EQGFEFEEGEEDA            | Chicken, NP_990646;                                      |
|                                                                                                                 | YNEA <u>AGN</u> KYV | DATAD EQGFEFEEGEEDA            | Human, AAB59507                                          |
| Vert. Class III <sup>d</sup> , minor neuronal;<br>neuron specific                                               | YNEA <u>SSH</u> KYV | DATAE EEGEMYEDDEEESEQGA        | Chicken, P32882;                                         |
|                                                                                                                 | YNEA <u>SSH</u> KYV | DATAE EEGEMYEDDEEESEQGA        | <i>Xenopus</i> , NP_001079533                            |
| Vertebrate class IVa <sup>d</sup> , major neural;<br>brain specific                                             | YNEA <u>TGG</u> KYV | DATAE EEGEMYEDDEEESEQGP        | Human, AAN85571                                          |
| Vertebrate class V <sup>d</sup> , minor constitutive;<br>absent from neurons                                    | YNES <u>SSQ</u> KYV | EATAN DGEEEFEDDEEEINE          | Chicken, P09653                                          |
|                                                                                                                 | YNES <u>SSQ</u> KYV | DATVN DGEEAFEDDEEEINE          | Chinese hamster,                                         |
| Vertebrate class VI <sup>d</sup> , major erythrocyte/<br>platelets; hematopoiesis specific                      | FNEA <u>YSH</u> KYV | DATAD VEYEEAEASPEKET           | AAZ14959                                                 |
|                                                                                                                 | YNEA <u>YGR</u> KYV | DVRAG LEDSEEDAEAEVEEDKD        | Chicken, P09207                                          |
|                                                                                                                 | YNEA <u>YGR</u> KYV | DAKAV LEEDEEVTEEAEMEPEDK       | Mouse, CAM26336                                          |
| Zebra fish, <i>Danio rubrio</i> , similar to<br>vertebrate class VI                                             | FNEA <u>HGG</u> KYV | DATAD MDYEEVEEVEESSIAH         | Human, AAH33679                                          |
|                                                                                                                 |                     | STQVEIKTEVVTETSVSE             | [S23], XP_686874                                         |
| Plants <sup>e</sup>                                                                                             |                     |                                |                                                          |
| <i>Zea Maize</i> , Beta-1, not expressed in pollen                                                              | YNEA <u>SCG</u> RFV | DATAD EEGEYEDDEEGDLQD          | [S51], CAA37060                                          |
| <i>Zea Maize</i> , Beta-2, expressed<br>in pollen (not major)                                                   | YNEA <u>SCG</u> RFV | DATAD EEADYEEEEAAA             | [S51], P18026                                            |
| <i>Zea Maize</i> , Beta-3, major pollen<br>expression                                                           | YNEA <u>GGG</u> RYV | DATAE EYDEEEQDGEHHD            | [S52], Q43695                                            |
| <i>Zea Maize</i> , Beta-4, major pollen<br>expression                                                           | YNEA <u>GGG</u> RYV | DATAE EYDEEEHDGEEHA            | [S52], CAA52719                                          |
| <i>Zea Maize</i> , Beta-5, expressed in pollen;<br>abundant in vegetative tissues                               | YNEA <u>SCG</u> RFV | DATAD EEAIEYEDDEEIQDE          | [S52], CAA52720                                          |
| Rice, <i>Oryza sativa</i>                                                                                       | YNEA <u>SCG</u> RFV | DATAD DEEEDYGDEEEDVAA          | [S53], CAA55912                                          |
| <i>Arabidopsis thaliana</i> , Beta 8                                                                            | YNEA <u>SCG</u> RFV | DATAD EEEGYEYEEDEVEVQEE        | [S54], BAB10059                                          |
| <i>Arabidopsis thaliana</i> , Beta 9                                                                            | FNEA <u>SGG</u> KYV | DATVG EEEYEDEEEEA              | [S55], CAB45884                                          |
| <i>Eucalyptus grandis</i>                                                                                       | YNEA <u>SGG</u> RYV | DATAD EELEYEDEDAEQDM           | [S56], ABS50669                                          |
| Lichen, <i>Parmelia serrana</i>                                                                                 | A <u>SNN</u> KYV    | Not available                  | [S57], AAO20049                                          |
| Spike moss (Lycophyte), <i>Selaginella</i><br><i>moellendorffi</i> (six sequences with<br>three different IVRs) | YNEA <u>SGG</u> RFV | DASAE EYDEEAELEQ               | [S29]                                                    |
|                                                                                                                 | YNEA <u>SGG</u> RYV | DAAVE ADYEDDDEEQAA             |                                                          |
|                                                                                                                 | YNEA <u>TGG</u> RYV | DASAE EEGEYEDAEELQA            |                                                          |
|                                                                                                                 | YNEA <u>TGG</u> RYV | DASAD DEYEEEEPEEELQS           |                                                          |
|                                                                                                                 | FTEA <u>TGG</u> RYV | DARPD DEG DYGE EEEQEGEYSQMS    |                                                          |
|                                                                                                                 | FNEA <u>SAG</u> RYV | DASID DDFGEDPTCSSVQSTA         |                                                          |
| Fungi                                                                                                           |                     |                                |                                                          |
| <i>Candida albicans</i>                                                                                         | FNEA <u>TSG</u> KYV | EASID EEELEYADEIPLEDAAME       | [S58], AAA34375                                          |
| <i>Saccharomyces cerevisiae</i>                                                                                 | FNEA <u>SSG</u> KVV | EATVE DDEVDENGDFGAPQNK         | [S59], P02557                                            |
|                                                                                                                 |                     | DEPITENFE                      |                                                          |
| <i>Beauveria bassiana</i>                                                                                       | FNEA <u>SGN</u> KYV | DAGID DEEEYEEELPIEGEEPL        | [S60], ABD61945                                          |
| <i>Schizosaccharomyces pombe</i>                                                                                | FNEA <u>AGG</u> KYV | EAGID EGDEDYEIEEEEKPLEY        | [S61], NP_596650                                         |
| <i>Aspergillus nidullans</i> , BenA                                                                             | FNEA <u>SGN</u> KYV | DASIS EGE EYAE EEEIMEGEE       | [S62], 1312295A                                          |
| <i>Aspergillus nidullans</i> , TubC                                                                             | FNEA <u>GGN</u> KYV | EATVS DGEGAYDAEEGEAYEQEE       | [S62], 1312295B                                          |
| <i>Septoria nodorum</i>                                                                                         | FNEA <u>SGN</u> KVV | EASIS EGE EYDEE APLEAEE        | [S63], AAB25800                                          |
| <i>Neurospora crassa</i>                                                                                        | FNEA <u>SGN</u> KYV | DAGVD EEE EY EEE EAPLEGEE      | [S64], AAA33617                                          |
| Flax rust, <i>Melampsora lini</i>                                                                               | YNEV <u>AGN</u> KYV | EAHVD EDEVD E EY EDEAPPEE      | [S65], AAG33239                                          |
| <i>Uromyces viciae-fabae</i>                                                                                    | YNEV <u>AAN</u> KYV | EAHMD DEEAEEAYEDEAPPEE         | [S66]                                                    |
| <i>Dissophora decumbens</i>                                                                                     | FNEA <u>AGA</u> KYV | Not available                  | AA440433                                                 |
| <i>Ellisomyces anomalus</i>                                                                                     | YNEG <u>SAG</u> KYV | Not available                  | AA440413                                                 |

Table S2. Continued

|                                                                                                      | IVR <sup>a</sup>          | C Terminus <sup>b</sup>        | References and/or<br>NCBI Protein<br>Database Accessions |
|------------------------------------------------------------------------------------------------------|---------------------------|--------------------------------|----------------------------------------------------------|
| <b>Protists</b>                                                                                      |                           |                                |                                                          |
| <i>Physarum polycephalum</i> ,<br>β2, major spindle beta                                             | YNEV <u>AGS</u> KYV       | EASVD DEAMEDDAEAEAGGAGQNEAVEEF | [S67], AAA29977                                          |
| Social amoeba, <i>Dictyostelium discoideum</i>                                                       | YNEA <u>RDG</u> KYV       | ETEED GGEYQEEHEEHEEQAEN        | [S68], P32256                                            |
| <b>III. Nonaxonemal β-Tubulins with More Than Three Amino Acids in the IVR</b>                       |                           |                                |                                                          |
| <b>Animals</b>                                                                                       |                           |                                |                                                          |
| <i>D. melanogaster</i> , β3 (60C)                                                                    | YNEA <u>SAVTRSSGG</u> KYV | EATAD DEFDPVNVQEEVEGDCI        | [S5], P08841                                             |
| <i>Apis mellifera</i> , β3 homolog                                                                   | YNEA <u>SVATSTNGG</u> KYV | EATAE EDFEAEECADDFFETCDQE      | [S20], XP-394469                                         |
| <i>Bombyx mori</i> , TUB3, β3 homolog                                                                | YNEA <u>SVATAESGG</u> KYV | EATAE DDTEFDQEDLEELAQDEHHD     | [S18], NP_001036888                                      |
| <i>Anopheles gambiae</i> , β3 homolog                                                                | YNEA <u>SAVSRASGG</u> KYV | EATAD DEFQEDCCQDEMEGECV        | [S19], EAA09971                                          |
| Anantarctic yellowbelly rockcod,<br><i>Notothenia coriiceps</i> , Similar to<br>vertebrate class III | YNEA <u>SGTGS</u> KYV     | DATAD EMGEYEDEIEDEEVRDHVRH     | [S24], AAG15317                                          |

Sequences are shown for representative axonemal (I) and nonaxonemal (II and III) β-tubulins in animals, plants, fungi, and protists. (Single-cell organisms are listed together for convenience, although protist species fall into many different phylogenetic groups [S69].)

<sup>a</sup> Internal variable regions: Amino acids 55–57 in most β-tubulins are underlined. Nonaxonemal β-tubulins with more than three amino acids in the IVR are listed separately (III). The IVR is flanked by more conserved sequences, as shown.

<sup>b</sup> C-terminal sequences: Shown after a highly conserved EYQQYQ sequence common to all β-tubulins. The variable C-terminal tail (CTT) starts at the position equivalent to residue 432 in *Drosophila* β2, indicated by spacing of the sequences shown.

<sup>c</sup> Axoneme β-tubulins: Conserved C-terminal consensus axoneme motifs are underlined (EGEF and then three additional acidic residues [S9]). Axoneme tubulins shown include known axoneme-utilized β-tubulins (including β-tubulins from species with multiple β-tubulin genes for which expression pattern is known and β-tubulins in ciliated or flagellated organisms with only one β-tubulin sequence) and also presumptive axonemal sequences identified by the presence of the CTT axoneme motif. A few known axonemal β-tubulins vary in one position (for example, EGEMDEE in mosquito). The axoneme-motif region is underlined and italicized in identified axonemal β-tubulins in which the sequence differs from the consensus motif sequence at more than one position. The proximal region of the C-terminal tail containing the axoneme motif is essential for axoneme assembly, but not for other kinds of microtubules; the distal region is dispensable [S6, S8, S14, S70, S71]. The axoneme motif appears to function in mediating axoneme structural stability, assembly of the central pair, and motility [S6, S8, S71, S72].

Axonemal β-tubulins have been characterized primarily for animals and protists. Many aquatic fungi have flagellated gametes, but we found only one presumptive axoneme β-tubulin sequence for this group and only two for plant species with flagellated gametes (see note e below). See also [S9, S38, S73] for comparisons of C-terminal sequences in axonemal and nonaxonemal β-tubulins.

<sup>d</sup> Vertebrate β-tubulins: Conserved gene family structure with seven distinct isotype classes that exhibit conserved patterns of expression (see [S22] and [S73–S77] and references therein). The vertebrate β-tubulin classes were defined by studies of β-tubulin gene families in chicken and mammalian species (including human, mouse, rat, rabbit, pig, cattle, and hamster); *Xenopus* β-tubulins also appear to fit the defined classes. However, teleost β-tubulin families may not have the same organization [S24]. Thus, the vertebrate β-tubulin family organization as originally defined may be restricted to tetrapod vertebrates. In the table, we have therefore provided representative examples of each isotype class for tetrapod species and have listed representative teleost β-tubulins separately. Expression patterns for the vertebrate isotypes are given in the table. The class IVb isotype is the major vertebrate axoneme β-tubulin. Vertebrate isotypes other than class IVb have primarily or only nonaxonemal expression or function. Many species, including *Drosophila*, other insects, and many protists, utilize only a single axonemal type β-tubulin in motile axonemes. However, this is not the case in mammals. In axonemes of mammalian cilia, the major testis class IVb β-tubulin isotype and the class I β-tubulin are coexpressed; class V β-tubulin is also present in some but not all cilia types [S72]. Thus, axonemes may incorporate β-tubulins of both the axonemal and nonaxonemal type. We have shown experimentally that axoneme assembly in *Drosophila* spermatogenesis can accommodate some coexpression of nonaxonemal β-tubulins along with the testis-specific β2-tubulin isoform, the relative amount compatible with functionality depending on the particular isotype (see Figure 2) [S3, S6, S10, S11, S14, S70, S71].

<sup>e</sup> Plant tubulins: We have listed sequences from *Chlamydomonas* and related species with protists according to the convention used in the table, but note that molecular phylogenetic analyses place these single-cell green algae with multicellular plants [S69]. In multicellular plants, flagellated gametes occur in many nonangiosperm basal groups, including ginkgo, cycads, ferns and related groups (including equisetum), lycophytes (spikemosses, club mosses, and quillworts), and bryophytes (mosses, hornworts, and liverworts) [S78 and S79]. At present, β-tubulin sequences with both IVR and CTT are available for two species with motile gametes: a bryophyte, the moss *Physcomitrella patens*, and a lycophyte, the spikemoss *Selaginella moellendorffii*. The *P. patens* β-tubulin family consists of six genes with very similar coding sequences [S28]; all six have an IVR sequence of SGG and a CTT axoneme-motif region sequence of EGEYEDD, compatible with other known variant axoneme motifs. We have included the *P. patens* sequence with axonemal β-tubulins (counted as one representative axonemal sequence in Table 4). Eleven complete β-tubulin sequences are presently available from the genome of *S. moellendorffii* [S29]. Of these, five have a canonical CTT axoneme motif of EGEFEEE and an IVR sequence of SGG; these are listed with axonemal β-tubulins (counted as one representative axonemal sequence in Table 4). The remaining six *S. moellendorffii* sequences are listed with nonaxonemal sequences. All angiosperms and gymnosperms other than ginkgo and cycads lack motile axonemes; thus, their β-tubulins are per force nonaxonemal.

<sup>f</sup> Nonaxonemal sequences: β-tubulins with known nonaxonemal expression and/or utilization, and β-tubulins in species that do not have motile axonemes [S9, S38, S73].

#### Supplemental References

- S1. Kempfues, K.J., Kaufman, T.C., Raff, R.A., and Raff, E.C. (1982). The testis-specific beta-tubulin subunit in *Drosophila melanogaster* has multiple functions in spermatogenesis. *Cell* 31, 655–670.
- S2. Kempfues, K.J., Raff, R.A., Kaufman, T.C., and Raff, E.C. (1979). Mutation in a structural gene for a beta-tubulin specific to testis in *Drosophila melanogaster*. *Proc. Natl. Acad. Sci. USA* 76, 3991–3995.
- S3. Fackenthal, J.D., Hutchens, J.A., Turner, F.R., and Raff, E.C. (1995). Structural analysis of mutations in the *Drosophila* β2-tubulin isoform reveals regions in the beta-tubulin molecule required for general and for tissue-specific microtubule functions. *Genetics* 139, 267–286.
- S4. Fuller, M.T., Caulton, J.H., Hutchens, J.A., Kaufman, T.C., and Raff, E.C. (1988). Mutations that encode partially functional beta 2 tubulin subunits have different effects on structurally different microtubule arrays. *J. Cell Biol.* 107, 141–152.
- S5. Rudolph, J.E., Kimble, M., Hoyle, H.D., Subler, M.A., and Raff, E.C. (1987). Three *Drosophila* beta-tubulin sequences: A developmentally regulated isoform (beta 3), the testis-specific isoform (beta 2), and



- an assembly-defective mutation of the testis-specific isoform (B2t8) reveal both an ancient divergence in metazoan isotypes and structural constraints for beta-tubulin function. *Mol. Cell. Biol.* **7**, 2231–2242.
- S6. Popodi, E.M., Hoyle, H.D., Turner, F.R., Xu, K., Kruse, S., and Raff, E.C. (2008). Axoneme specialization embedded in a “Generalist” beta-tubulin. *Cell Motil. Cytoskeleton* **65**, 216–237.
- S7. Nielsen, M.G., and Raff, E.C. (2002). The best of all worlds or the best possible world? Developmental constraint in the evolution of beta-tubulin and the sperm tail axoneme. *Evol. Dev.* **4**, 303–315.
- S8. Nielsen, M.G., Turner, F.R., Hutchens, J.A., and Raff, E.C. (2001). Axoneme-specific beta-tubulin specialization: A conserved C-terminal motif specifies the central pair. *Curr. Biol.* **11**, 529–533.
- S9. Raff, E.C., Fackenthal, J.D., Hutchens, J.A., Hoyle, H.D., and Turner, F.R. (1997). Microtubule architecture specified by a beta-tubulin isoform. *Science* **275**, 70–73.
- S10. Hoyle, H.D., and Raff, E.C. (1990). Two *Drosophila* beta tubulin isoforms are not functionally equivalent. *J. Cell Biol.* **111**, 1009–1026.
- S11. Hoyle, H.D., Hutchens, J.A., Turner, F.R., and Raff, E.C. (1995). Regulation of beta-tubulin function and expression in *Drosophila* spermatogenesis. *Dev. Genet.* **16**, 148–170.
- S12. Kimble, M., Dettman, R.W., and Raff, E.C. (1990). The beta 3-tubulin gene of *Drosophila melanogaster* is essential for viability and fertility. *Genetics* **126**, 991–1005.
- S13. Kimble, M., Incardona, J.P., and Raff, E.C. (1989). A variant beta-tubulin isoform of *Drosophila melanogaster* (beta 3) is expressed primarily in tissues of mesodermal origin in embryos and pupae, and is utilized in populations of transient microtubules. *Dev. Biol.* **131**, 415–429.
- S14. Hoyle, H.D., Turner, F.R., Brunick, L., and Raff, E.C. (2001). Tubulin sorting during dimerization in vivo. *Mol. Biol. Cell* **12**, 2185–2194.
- S15. Hoyle, H.D., Turner, F.R., and Raff, E.C. (2008). Axoneme-dependent tubulin modifications in singlet microtubules of the *Drosophila* sperm tail. *Cell Motil. Cytoskeleton* **65**, 295–313.
- S16. Adams, M.D., Celniker, S.E., Holt, R.A., Evans, C.A., Gocayne, J.D., Amanatides, P.G., Scherer, S.E., Li, P.W., Hoskins, R.A., Galle, R.F., et al. (2000). The genome sequence of *Drosophila melanogaster*. *Science* **287**, 2185–2195.
- S17. Nielsen, M.G., Caserta, J.M., Kidd, S.J., and Phillips, C.M. (2006). Functional constraint underlies 60 million year stasis of Dipteran testis-specific beta-tubulin. *Evol. Dev.* **8**, 23–29.
- S18. Kawasaki, H., Sugaya, K., Quan, G.X., Nohata, J., and Mita, K. (2003). Analysis of alpha- and beta-tubulin genes of *Bombyx mori* using an EST database. *Insect Biochem. Mol. Biol.* **33**, 131–137.
- S19. Holt, R.A., Subramanian, G.M., Halpern, A., Sutton, G.G., Charlab, R., Nusskern, D.R., Wincker, P., Clark, A.G., Ribeiro, J.M., Wides, R., et al. (2002). The genome sequence of the malaria mosquito *Anopheles gambiae*. *Science* **298**, 129–149.
- S20. Honeybee Genome Sequencing Consortium (2006). Insights into social insects from the genome of the honeybee *Apis mellifera*. *Nature* **443**, 931–949.
- S21. Wang, L., Wang, S., Li, Y., Paradesi, M.S., and Brown, S.J. (2007). BeetleBase: The model organism database for *Tribolium castaneum*. *Nucleic Acids Res.* **35**, D476–D479.
- S22. Murphy, D.B., Wallis, K.T., Machlin, P.S., Ratrie, H., 3rd, and Cleveland, D.W. (1987). The sequence and expression of the divergent beta-tubulin in chicken erythrocytes. *J. Biol. Chem.* **262**, 14305–14312.
- S23. Woods, I.G., Wilson, C., Friedlander, B., Chang, P., Reyes, D.K., Nix, R., Kelly, P.D., Chu, F., Postlethwait, J.H., and Talbot, W.S. (2005). The zebrafish gene map defines ancestral vertebrate chromosomes. *Genome Res.* **15**, 1307–1314.
- S24. Detrich, H.W., 3rd, Parker, S.K., Williams, R.C., Jr., Nogales, E., and Downing, K.H. (2000). Cold adaptation of microtubule assembly and dynamics. Structural interpretation of primary sequence changes present in the alpha- and beta-tubulins of Antarctic fishes. *J. Biol. Chem.* **275**, 37038–37047.
- S25. Sodergren, E., Weinstock, G.M., Davidson, E.H., Cameron, R.A., Gibbs, R.A., Angerer, R.C., Angerer, L.M., Arnone, M.I., Burgess, D.R., et al. Sea Urchin Genome Sequencing Consortium (2006). The genome of the sea urchin *Strongylocentrotus purpuratus*. *Science* **314**, 941–952.
- S26. Di Bernardo, M.G., Gianguzza, F., Ciaccio, M., Palla, F., Colombo, P., Di Blasi, F., Fais, M., and Spinelli, G. (1989). Nucleotide sequence of a full length cDNA clone encoding for beta-tubulin of the sea urchin *Paracentrotus lividus*. *Nucleic Acids Res.* **17**, 5851.
- S27. Miya, T., and Satoh, N. (1997). Isolation and characterization of cDNA clones for beta-tubulin genes as a molecular marker for neural cell differentiation in the ascidian embryo. *Int. J. Dev. Biol.* **41**, 551–557.
- S28. Jost, W., Baur, A., Nick, P., Reski, R., and Gorr, G. (2004). A large plant beta-tubulin family with minimal C-terminal variation but differences in expression. *Gene* **340**, 151–160.
- S29. DOE Joint Genome Institute (2008). Selaginella moellendorffii genome project. (<http://genome.jgi-psf.org/Selmo1/Selmo1.home.html>).
- S30. Ribichich, K.F., Salem-Izacc, S.M., Georg, R.C., Vencio, R.Z., Navarro, L.D., and Gomes, S.L. (2005). Gene discovery and expression profile analysis through sequencing of expressed sequence tags from different developmental stages of the chytridiomycete *Blastocladiella emersonii*. *Eukaryot. Cell* **4**, 455–464.
- S31. Merchant, S.S., Prochnik, S.E., Vallon, O., Harris, E.H., Karpowicz, S.J., Witman, G.B., Terry, A., Salamov, A., Fritz-Laylin, L.K., Marechal-Drouard, L., et al. (2007). The Chlamydomonas genome reveals the evolution of key animal and plant functions. *Science* **318**, 245–250.
- S32. Barahona, I., Soares, H., Cyrne, L., Penque, D., Denoulet, P., and Rodrigues-Pousada, C. (1988). Sequence of one alpha- and two beta-tubulin genes of *Tetrahymena pyriformis*. Structural and functional relationships with other eukaryotic tubulin genes. *J. Mol. Biol.* **202**, 365–382.
- S33. Libusova, L., and Draber, P. (2006). Multiple tubulin forms in ciliated protozoan *Tetrahymena* and *Paramecium* species. *Protoplasma* **227**, 65–76.
- S34. Dupuis, P. (1992). The beta-tubulin genes of *Paramecium* are interrupted by two 27 bp introns. *EMBO J.* **11**, 3713–3719.
- S35. Canaday, J., Tessier, L.H., Imbault, P., and Paulus, F. (2001). Analysis of *Euglena gracilis* alpha-, beta- and gamma-tubulin genes: Introns and pre-mRNA maturation. *Mol. Genet. Genomics* **265**, 153–160.
- S36. Conner, T.W., Thompson, M.D., and Silflow, C.D. (1989). Structure of the three beta-tubulin-encoding genes of the unicellular alga, *Polytomella agilis*. *Gene* **84**, 345–358.
- S37. Harper, J.F., and Mages, W. (1988). Organization and structure of *Volvox* beta-tubulin genes. *Mol. Gen. Genet.* **213**, 315–324.
- S38. Dutcher, S.K. (2001). Motile organelles: The importance of specific tubulin isoforms. *Curr. Biol.* **11**, R419–R422.
- S39. MacKay, R.M., and Gallant, J.W. (1991). Beta-tubulins are encoded by at least four genes in the brown alga *Ectocarpus variabilis*. *Plant Mol. Biol.* **17**, 487–492.
- S40. Conzelmann, K.K., and Helftenbein, E. (1987). Nucleotide sequence and expression of two beta-tubulin genes in *Stylonychia lemnae*. *J. Mol. Biol.* **198**, 643–653.
- S41. Hall, N., Berriman, M., Lennard, N.J., Harris, B.R., Hertz-Fowler, C., Bart-Delabesse, E.N., Gerrard, C.S., Atkin, R.J., Barron, A.J., Bowman, S., et al. (2003). The DNA sequence of chromosome I of an African trypanosome: Gene content, chromosome organisation, recombination and polymorphism. *Nucleic Acids Res.* **31**, 4864–4873.
- S42. Delves, C.J., Ridley, R.G., Goman, M., Holloway, S.P., Hyde, J.E., and Scaife, J.G. (1989). Cloning of a beta-tubulin gene from *Plasmodium falciparum*. *Mol. Microbiol.* **3**, 1511–1519.
- S43. Nagel, S.D., and Boothroyd, J.C. (1988). The alpha- and beta-tubulins of *Toxoplasma gondii* are encoded by single copy genes containing multiple introns. *Mol. Biochem. Parasitol.* **29**, 261–273.
- S44. Jackson, A.P., Vaughan, S., and Gull, K. (2006). Comparative genomics and concerted evolution of beta-tubulin paralogs in *Leishmania* spp. *BMC Genomics* **7**, 137.
- S45. Paul, E.C., Buchschacher, G.L., Jr., Cunningham, D.B., Dove, W.F., and Burland, T.G. (1992). Preferential expression of one beta-tubulin gene during flagellate development in *Physarum*. *J. Gen. Microbiol.* **138**, 229–238.
- S46. Lai, E.Y., Remillard, S.P., and Fulton, C. (1994). A beta-tubulin gene of *Naegleria* encodes a carboxy-terminal tyrosine. Aromatic amino acids are conserved at carboxy termini. *J. Mol. Biol.* **235**, 377–388.
- S47. Morrison, H.G., McArthur, A.G., Gillin, F.D., Aley, S.B., Adam, R.D., Olsen, G.J., Best, A.A., Cande, W.Z., Chen, F., Cipriano, M.J., et al. (2007). Genomic minimalism in the early diverging intestinal parasite *Giardia lamblia*. *Science* **317**, 1921–1926.
- S48. King, N., Westbrook, M.J., Young, S.L., Kuo, A., Abedin, M., Chapman, J., Fairclough, S., Hellsten, U., Isogai, Y., Letunic, I., et al. (2008). The genome of the choanoflagellate *Monosiga brevicollis* and the origin of metazoans. *Nature* **451**, 783–788.
- S49. Michiels, F., Falkenburg, D., Muller, A.M., Hinz, U., Otto, U., Bellmann, R., Glatzer, K.H., Brand, R., Bialojan, S., and Renkawitz-Pohl, R. (1987).

- Testis-specific beta 2 tubulins are identical in *Drosophila melanogaster* and *D. hydei* but differ from the ubiquitous beta 1 tubulin. *Chromosoma* 95, 387–395.
- S50. Savage, C., Hamelin, M., Culotti, J.G., Coulson, A., Albertson, D.G., and Chalfie, M. (1989). *mec-7* is a beta-tubulin gene required for the production of 15-protofilament microtubules in *Caenorhabditis elegans*. *Genes Dev.* 3, 870–881.
- S51. Hussey, P.J., Haas, N., Hunsperger, J., Larkin, J., Snustad, D.P., and Silflow, C.D. (1990). The beta-tubulin gene family in *Zea mays*: Two differentially expressed beta-tubulin genes. *Plant Mol. Biol.* 15, 957–972.
- S52. Rogers, H.J., Greenland, A.J., and Hussey, P.J. (1993). Four members of the maize beta-tubulin gene family are expressed in the male gametophyte. *Plant J.* 4, 875–882.
- S53. Breviario, D., Giani, S., and Meoni, C. (1995). Three rice cDNA clones encoding different beta-tubulin isoforms. *Plant Physiol.* 108, 823–824.
- S54. Sato, S., Kotani, H., Nakamura, Y., Kaneko, T., Asamizu, E., Fukami, M., Miyajima, N., and Tabata, S. (1997). Structural analysis of *Arabidopsis thaliana* chromosome 5. I. Sequence features of the 1.6 Mb regions covered by twenty physically assigned P1 clones. *DNA Res.* 4, 215–230.
- S55. Arabidopsis Genome Initiative (2000). Analysis of the genome sequence of the flowering plant *Arabidopsis thaliana*. *Nature* 408, 796–815.
- S56. Spokevicius, A.V., Southerton, S.G., MacMillan, C.P., Qiu, D., Gan, S., Tibbitts, J.F., Moran, G.F., and Bossinger, G. (2007). beta-tubulin affects cellulose microfibril orientation in plant secondary fibre cell walls. *Plant J.* 51, 717–726.
- S57. Crespo, A., Molina, C.M., Blanco, O., Schroeter, B., Sancho, L.G., and Hawksworth, D.L. (2002). rDNA ITS and beta-tubulin gene sequence analyses reveal two monophyletic groups within the cosmopolitan lichen *Parmelia saxatilis*. *Mycol. Res.* 106, 788–795.
- S58. Smith, H.A., Allaudeen, H.S., Whitman, M.H., Koltin, Y., and Gorman, J.A. (1988). Isolation and characterization of a beta-tubulin gene from *Candida albicans*. *Gene* 63, 53–63.
- S59. Neff, N.F., Thomas, J.H., Grisafi, P., and Botstein, D. (1983). Isolation of the beta-tubulin gene from yeast and demonstration of its essential function in vivo. *Cell* 33, 211–219.
- S60. Zou, G., Ying, S.H., Shen, Z.C., and Feng, M.G. (2006). Multi-sited mutations of beta-tubulin are involved in benzimidazole resistance and thermotolerance of fungal biocontrol agent *Beauveria bassiana*. *Environ. Microbiol.* 8, 2096–2105.
- S61. Wood, V., Gwilliam, R., Rajandream, M.A., Lyne, M., Lyne, R., Stewart, A., Sgouros, J., Peat, N., Hayles, J., Baker, S., et al. (2002). The genome sequence of *Schizosaccharomyces pombe*. *Nature* 415, 871–880.
- S62. May, G.S., Tsang, M.L., Smith, H., Fidel, S., and Morris, N.R. (1987). *Aspergillus nidulans* beta-tubulin genes are unusually divergent. *Gene* 55, 231–243.
- S63. Cooley, R.N., and Caten, C.E. (1993). Molecular analysis of the *Septoria nodorum* beta-tubulin gene and characterization of a benomyl-resistance mutation. *Mol. Gen. Genet.* 237, 58–64.
- S64. Orbach, M.J., Porro, E.B., and Yanofsky, C. (1986). Cloning and characterization of the gene for beta-tubulin from a benomyl-resistant mutant of *Neurospora crassa* and its use as a dominant selectable marker. *Mol. Cell. Biol.* 6, 2452–2461.
- S65. Ayliffe, M.A., Dodds, P.N., and Lawrence, G.J. (2001). Characterisation of a beta-tubulin gene from *Melampsora lini* and comparison of fungal beta-tubulin genes. *Mycol. Res.* 105, 818–826.
- S66. Wirsal, S.G.R., Voegelé, R.T., Baenninger, R., and Mendgen, K.W. (2004). Cloning of beta-tubulin and succinate dehydrogenase genes from *Uromyces fabae* and establishing selection conditions for their use in transformation. *Eur. J. Plant Pathol.* 110, 767–777.
- S67. Burland, T.G., Paul, E.C., Oetliker, M., and Dove, W.F. (1988). A gene encoding the major beta tubulin of the mitotic spindle in *Physarum polycephalum* plasmodia. *Mol. Cell. Biol.* 8, 1275–1281.
- S68. Trivinos-Lagos, L., Ohmachi, T., Albrighson, C., Burns, R.G., Ennis, H.L., and Chisholm, R.L. (1993). The highly divergent alpha- and beta-tubulins from *Dictyostelium discoideum* are encoded by single genes. *J. Cell Sci.* 105, 903–911.
- S69. Steenkamp, E.T., Wright, J., and Baldauf, S.L. (2006). The protistan origins of animals and fungi. *Mol. Biol. Evol.* 23, 93–106.
- S70. Fackenthal, J.D., Turner, F.R., and Raff, E.C. (1993). Tissue-specific microtubule functions in *Drosophila* spermatogenesis require the beta-2-tubulin isotype-specific carboxy terminus. *Dev. Biol.* 158, 213–227.
- S71. Popodi, E.M., Hoyle, H.D., Turner, F.R., and Raff, E.C. (2005). The proximal region of the beta-tubulin C-terminal tail is sufficient for axoneme assembly. *Cell Motil. Cytoskeleton* 62, 48–64.
- S72. Vent, J., Wyatt, T.A., Smith, D.D., Banerjee, A., Luduena, R.F., Sisson, J.H., and Hallworth, R. (2005). Direct involvement of the isotype-specific C-terminus of beta tubulin in ciliary beating. *J. Cell Sci.* 118, 4333–4341.
- S73. Luduena, R.F. (1998). Multiple forms of tubulin: Different gene products and covalent modifications. *Int. Rev. Cytol.* 178, 207–275.
- S74. Sullivan, K.F. (1988). Structure and utilization of tubulin isoforms. *Annu. Rev. Cell Biol.* 4, 687–716.
- S75. Sullivan, K.F., and Cleveland, D.W. (1986). Identification of conserved isotype-defining variable region sequences for four vertebrate beta tubulin polypeptide classes. *Proc. Natl. Acad. Sci. USA* 83, 4327–4331.
- S76. Lopata, M.A., and Cleveland, D.W. (1987). In vivo microtubules are copolymers of available beta-tubulin isoforms: localization of each of six vertebrate beta-tubulin isoforms using polyclonal antibodies elicited by synthetic peptide antigens. *J. Cell Biol.* 105, 1707–1720.
- S77. Lewis, S.A., Gilmartin, M.E., Hall, J.L., and Cowan, N.J. (1985). Three expressed sequences within the human beta-tubulin multigene family each define a distinct isoform. *J. Mol. Biol.* 182, 11–20.
- S78. Renzaglia, K.S., and Garbary, D.J. (2001). Motile gametes of land plants: Diversity, development, and evolution. *Crit. Rev. Plant Sci.* 20, 107–213.
- S79. Hyams, J.S., and Campbell, C.J. (1985). Widespread absence of outer dynein arms in the spermatozooids of lower plants. *Cell Biol. Int. Rep.* 9, 841–848.
